# Supplementary material for: Development Control and Inactivation of Byssochlamys nivea Ascospores by Hyperbaric Storage at Room Temperature
Source: MDPI journal article supplement (doi:10.3390/foods12050978), 2023-02-25
Supplement: s1 [file foods-2229813-SI.pdf › foods-2229813-SI.pdf]

## Supplementary Materials

**Table S1.** Impact of different pre-activation steps in inactivation kinetics of *B. nivea* ascospores

| Activation step                      | Pressure (MPa) | D-Value (Days) | R <sup>2</sup> | RMSE   | Z-value (MPa)    | R <sup>2</sup> | RMSE   | Note***                                                                          |
|--------------------------------------|----------------|----------------|----------------|--------|------------------|----------------|--------|----------------------------------------------------------------------------------|
| No activation                        | 50             | 26.43 ± 6.01   | 0.7762         | 0.2234 | -                | -              | -      | -                                                                                |
|                                      | 75             | 22.41 ± 2.46   | 0.9407         | 0.1240 |                  |                |        |                                                                                  |
| Thermal activation<br>(80 °C/30 sec) | 25             | 29.92 ± 4.47   | 0.8222         | 0.1789 | 91.69 ± 38.75    | 0.8480         | 0.4102 | D-value obtained from the 2 <sup>nd</sup> day of storage onwards                 |
|                                      | 75             | 2.50 ± 0.71    | 0.8609         | 0.7952 |                  |                |        | D-value obtained from the 1 <sup>st</sup> to the 10 <sup>th</sup> day of storage |
|                                      | 150            | 1.11 ± 0.04    | 0.9987         | 0.0941 |                  |                |        | D-value obtained from the 1 <sup>st</sup> to the 5 <sup>th</sup> day of storage  |
| HPP activation<br>(600 MPa, 3 min)   | 25             | 2.79 ± 0.17    | 0.9928         | 0.0810 | 110.43 ± 37.66** | 0.8958         | 0.1092 | D-value obtained until the 5 <sup>th</sup> day of storage                        |
|                                      | 50*            | 1.22 ± 0.33    | 0.9332         | 0.3103 |                  |                |        | D-value obtained until the 2 <sup>nd</sup> day of storage                        |
|                                      | 50*            | 21.82 ± 1.43   | 0.9957         | 0.0172 |                  |                |        | D-value obtained from the 2 <sup>nd</sup> to the 10 <sup>th</sup> day of storage |
|                                      | 75             | 0.99 ± 0.08    | 0.9932         | 0.1184 |                  |                |        | D-value obtained until the 2 <sup>nd</sup> day of storage                        |
|                                      | 150            | 1.03 ± 0.56    | 0.7693         | 0.7512 |                  |                |        | D-value obtained until the 2 <sup>nd</sup> day of storage                        |

\*Biphasic behaviour

\*\*Z-value obtained considering only the first D-value of 50 MPa, and excluding the D-value from 150 MPa

\*\*\*D-values were obtained using a minimum of three experimental points

**Figure S1**

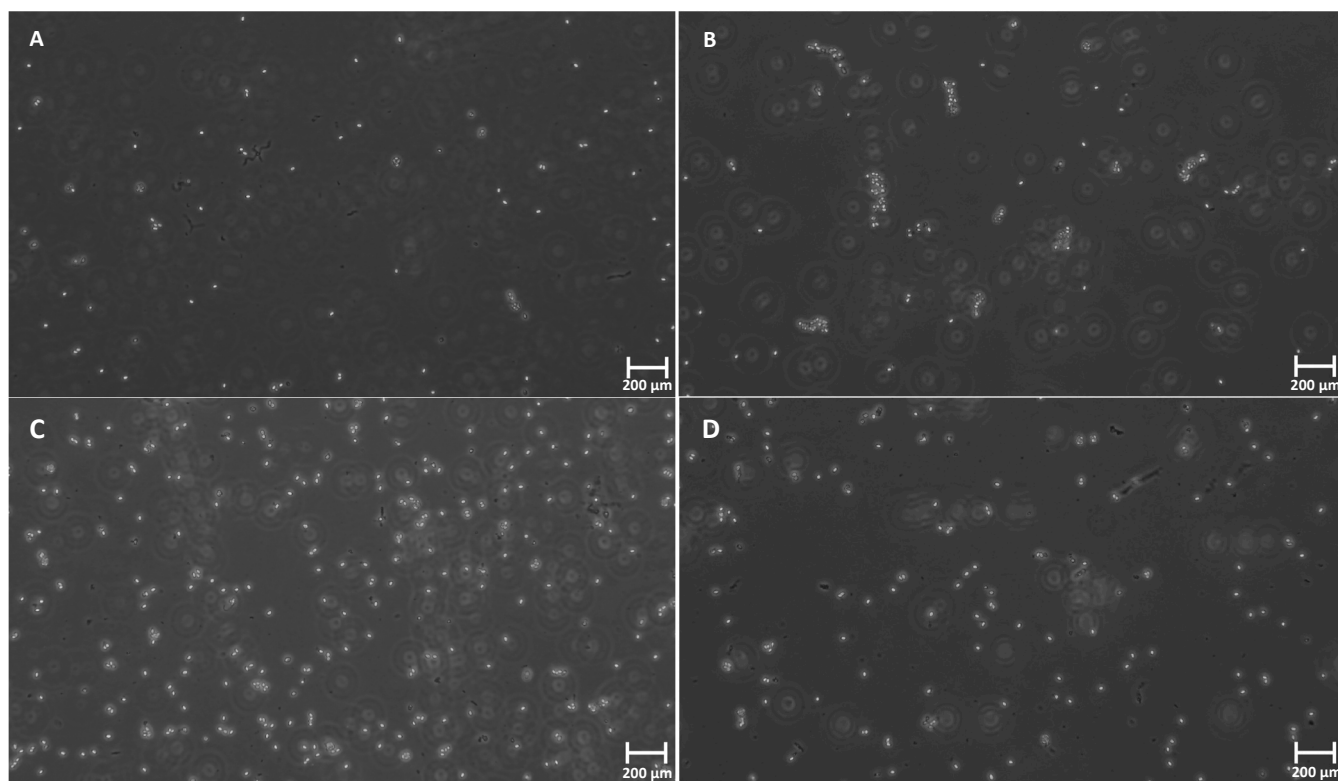

**Figure S1.** Phase contrast microscopy images (20X magnification) of the commercial apple juice inoculated with *B. nivea* ascospores in unpasteurized samples (A), thermally pasteurized samples at 70 °C/30 sec (B) and 80 °C/30 sec (C), and HPP- pasteurized samples at 600 MPa/3 min, 17 °C (D) at the beginning of the storage experiments.
